# Supplementary material for: Fu brick tea alleviates alcoholic liver injury by modulating the gut microbiota–liver axis and inhibiting the hepatic TLR4/NF-κB signaling pathway
Source: Royal Society of Chemistry journal article supplement (doi:10.1039/d2fo01547a), 2022-01-01
Supplement: d2fo01547a1.pdf [file d2fo01547a1.pdf]

## Supplemental Materials

### **Fu Brick Tea Alleviates Alcoholic Liver Injury by Modulating Gut Microbiota-Liver Axis and Inhibiting Hepatic TLR4/NF- $\kappa$ B Signaling Pathway**

Yao Du<sup>a</sup>, Chengcheng Yang<sup>b</sup>, Daoyuan Ren<sup>a\*</sup>, Hongjun Shao<sup>a</sup>, Yan Zhao<sup>b</sup>, and Xingbin Yang<sup>a,\*</sup>

<sup>a</sup>*Shaanxi Engineering Laboratory for Food Green Processing and Safety Control, and Shaanxi Key Laboratory for Hazard Factors Assessment in Processing and Storage of Agricultural Products, College of Food Engineering and Nutritional Science, Shaanxi Normal University, Xi'an 710119, China*

<sup>b</sup>*Key Laboratory of Ministry of Education for Medicinal Resource and Natural Pharmaceutical Chemistry, College of Life Sciences, Shaanxi Normal University, Xi'an 710119, China*

-----  
\*Correspondence: dyren@snnu.edu.cn (D.Y. Ren), xbyang@snnu.edu.cn (X.B. Yang); Tel.: +86-29-85310580, Fax: +86-29-853105

**Supplementary Table 1** Primers Used for Real-Time Quantitative PCR

---

| Primers        | Forward primer        | Reverse primer          |
|----------------|-----------------------|-------------------------|
| CYP2E1         | CCAGTCGAGTCTACATTGTCA | TTCATTCTGTCTTCTAACTGG   |
| TLR4           | CCAGCCTCCTCAGAAACAGA  | TCCCTCCAGCAGTGAAGAAG    |
| NF- $\kappa$ B | ATCTGTTTCCCCTCATCTTT  | GTCTTGGTGGTATCTGTGCT    |
| TNF- $\alpha$  | CTCTTCTCATTCTGCTTGT   | GTGGTTTGTGAGTGTGAGG     |
| IL-1 $\beta$   | ATTGTGGCTGTGGAGAAG    | AAGATGAAGGAAAAGAAGGTG   |
| ZO-1           | TGGGAACAGCACACAGTGAC  | GCTGGCCCTCCTTTAACAC     |
| Occludin       | ACCCGAAGAAAGATGGATCG  | CATAGTCAGATGGGGGTGGA    |
| Claudin        | CGGGCAGATACAGTGCAAAG  | ACTTCATGCCAATGGTGGAC    |
| GAPDH          | AGGTCGGTGTGAACGGATTTG | TGTAGACCATGTAGTTGAGGTCA |

---

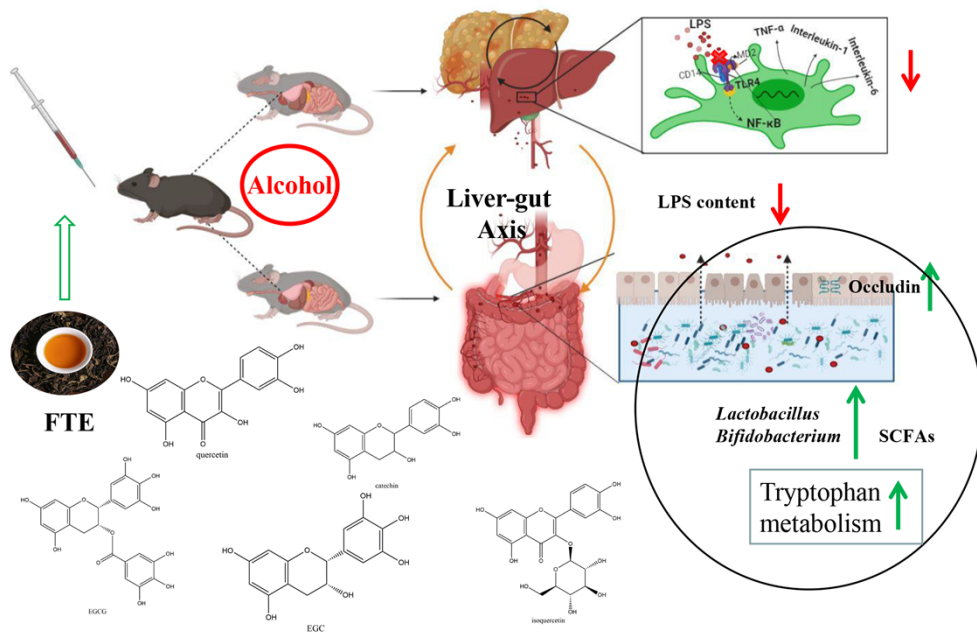

**Supplementary Figure 1** Proposed pathway for the protective mechanism of FTE against alcoholic liver injury in C57BL/6J Mice. FTE alleviated liver injury by targeting gut-liver axis, which highlighted that FTE improved the dysfunction of gut microbiota metabolism caused by alcohol intake, and then repaired intestinal barrier damage to reduce circulating LPS, and subsequently inhibited hepatic TLR4/NF-κB signaling pathway for liver protection.
